# Supplementary material for: Efficient visible-light photocatalytic H2 evolution over metal-free g-C3N4 co-modified with robust acetylene black and Ni(OH)2 as dual co-catalysts
Source: Royal Society of Chemistry journal article supplement (doi:10.1039/c6ra03118h), 2016-01-01
Supplement: c6ra03118h1.pdf [file c6ra03118h1.pdf]

## Electronic Supplementary Information

### Efficient visible-light photocatalytic H<sub>2</sub> evolution over metal-free g-C<sub>3</sub>N<sub>4</sub> co-modified via robust acetylene black and Ni(OH)<sub>2</sub> as dual co-catalysts

Guican Bi,<sup>a,b,†</sup> Jiuqing Wen,<sup>a,b,†</sup> Xin Li,<sup>a,b,\*</sup> Wei Liu,<sup>a</sup> Jun Xie,<sup>a,b,\*</sup> Yueping Fang,<sup>a</sup> Weiwei Zhang<sup>a,b</sup>

<sup>a</sup> College of Materials and Energy, South China Agricultural University, Guangzhou 510642, PR China

<sup>b</sup>Key Laboratory of Energy Plants Resource and Utilization, Ministry of Agriculture, Key Laboratory of Biomass Energy of Guangdong Regular Higher Education Institutions, South China Agricultural University, Guangzhou 510642, PR China

\*Corresponding author. [Xinliscou@yahoo.com](mailto:Xinliscou@yahoo.com) (X. Li), [xiejun@scau.edu.cn](mailto:xiejun@scau.edu.cn) (J. Xie)

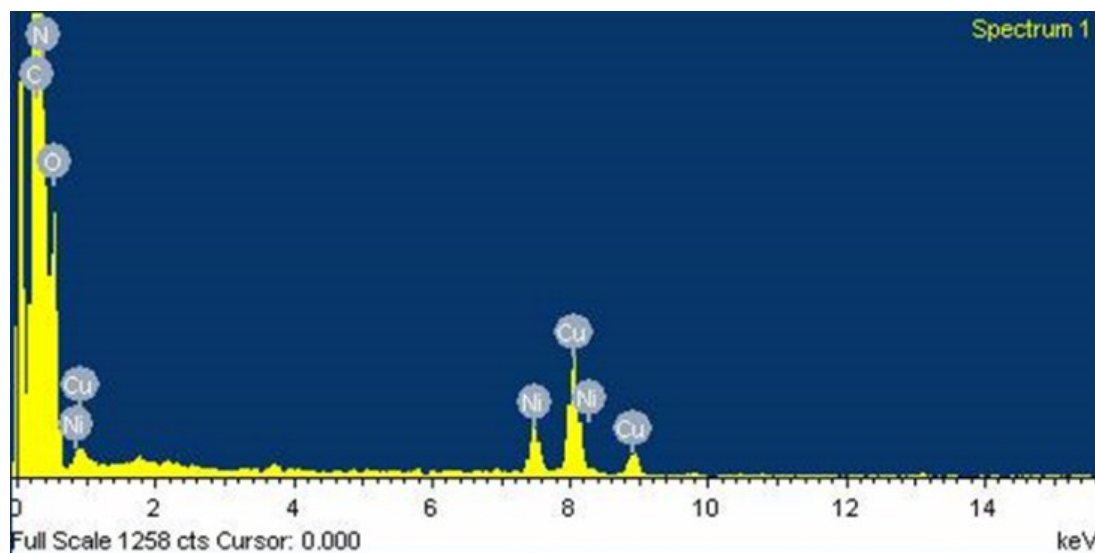

**Figure S1** Energy dispersive X-ray (EDX) spectrum of g-C<sub>3</sub>N<sub>4</sub>-0.5%AB-1.0% Ni(OH)<sub>2</sub> sample.

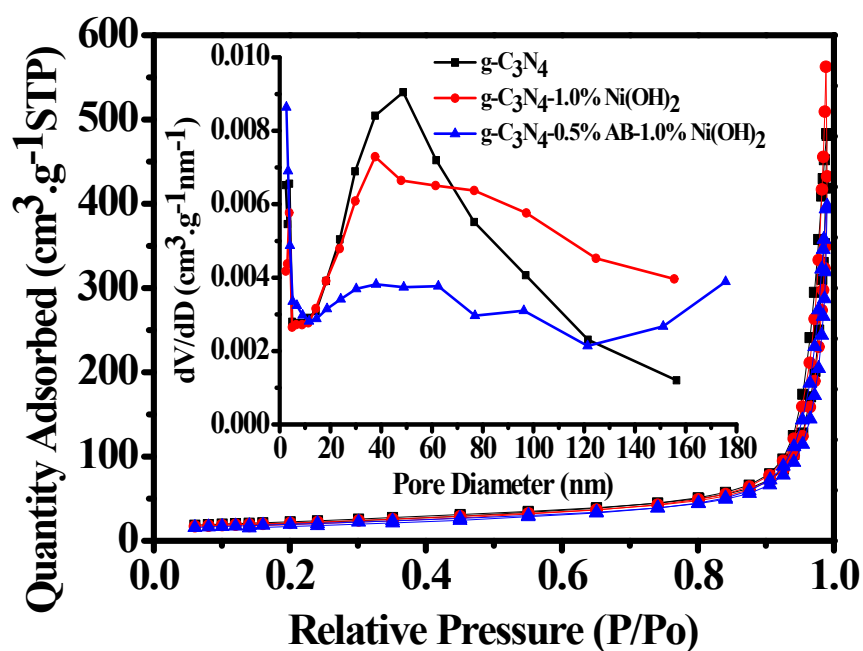

**Figure S2** N<sub>2</sub> adsorption–desorption isotherms and the corresponding pore size distribution curves (inset) of g-C<sub>3</sub>N<sub>4</sub>, g-C<sub>3</sub>N<sub>4</sub>-1.0%Ni(OH)<sub>2</sub> and g-C<sub>3</sub>N<sub>4</sub>-0.5%AB-1.0% Ni(OH)<sub>2</sub>.

**Table S1.** Pore structure parameter of g-C<sub>3</sub>N<sub>4</sub>, g-C<sub>3</sub>N<sub>4</sub>-1.0%Ni(OH)<sub>2</sub> and g-C<sub>3</sub>N<sub>4</sub>-0.5%AB-1.0%Ni(OH)<sub>2</sub>.

| Photocatalysts                                                  | BET Surface<br>area(m <sup>2</sup> g <sup>-1</sup> ) | Mean pore<br>Diameter<br>(nm) | Pore<br>volume<br>(cm <sup>3</sup> g <sup>-1</sup> ) |
|-----------------------------------------------------------------|------------------------------------------------------|-------------------------------|------------------------------------------------------|
| g-C <sub>3</sub> N <sub>4</sub>                                 | 79.20                                                | 34.96                         | 0.75                                                 |
| g-C <sub>3</sub> N <sub>4</sub> -1.0%Ni(OH) <sub>2</sub>        | 74.30                                                | 42.22                         | 0.67                                                 |
| g-C <sub>3</sub> N <sub>4</sub> -0.5%AB-1.0%Ni(OH) <sub>2</sub> | 68.19                                                | 33.33                         | 0.62                                                 |
